# Supplementary material for: Impact of rare earth (RE3+ = La3+, Sm3+) substitution in the A site perovskite on the structural, and electrical properties of Ba(Zr0.9Ti0.1)O3 ceramics
Source: Royal Society of Chemistry journal article supplement (doi:10.1039/d2ra01483a), 2022-01-01
Supplement: d2ra01483a1.pdf [file d2ra01483a1.pdf]

Table S1. Experimental parameters for X-ray powder diffraction of BZT, BLaZT and BSmZT powders.

| <b>Crystallographic data</b> |                                |                                |                                |
|------------------------------|--------------------------------|--------------------------------|--------------------------------|
| Chemical formula             | BZT                            | BSmZT                          | BLaZT                          |
| Crystal system               | Cubic                          | Cubic                          | Cubic                          |
| Space group                  | <i>Pm<math>\bar{3}m</math></i> | <i>Pm<math>\bar{3}m</math></i> | <i>Pm<math>\bar{3}m</math></i> |
| a (Å)                        | 4.18061(11)                    | 4.17226(11)                    | 4.17882(12)                    |
| Volume (Å <sup>3</sup> )     | 73.067(3)                      | 72.630(3)                      | 72.973(4)                      |
| Z                            | 1                              | 1                              | 1                              |
| Density (g/cm <sup>3</sup> ) | 6.002                          | 6.0873                         | 6.1179                         |
| Crystallite size (µm)        | 0.126                          | 0.109                          | 0.123                          |
| <b>Data collection</b>       |                                |                                |                                |
| Temperature (°C)             | 25                             | 25                             | 25                             |
| CuKα Radiations (Å)          | 1.5406                         | 1.5406                         | 1.5406                         |
| Measuring range (°)          | 10 ≤ 2θ ≤ 120                  | 10 ≤ 2θ ≤ 120                  | 10 ≤ 2θ ≤ 120                  |
| Step (2θ)                    | 0.015                          | 0.015                          | 0.015                          |
| <b>Rietveld data</b>         |                                |                                |                                |
| Program                      | Jana 2006                      | Jana 2006                      | Jana 2006                      |
| Profile fonction             | Pseudo-Voigt                   | Pseudo-Voigt                   | Pseudo-Voigt                   |
| Caglioti parameters          | U = 0.051(5)                   | U = 0.038(6)                   | U = 0.018(2)                   |
|                              | V = -0.055(4)                  | V = -0.030(8)                  | V = -0.026(9)                  |
|                              | W = 0.037(2)                   | W = 0.024(4)                   | W = 0.029(1)                   |
| Rp (%)                       | 6.16                           | 6.20                           | 6.26                           |
| Rwp (%)                      | 8.43                           | 8.45                           | 8.86                           |
| GOF                          | 1.31                           | 1.35                           | 1.49                           |

Table S2. Refined structural parameters for BZT, BLaZT and BSmZT powder from X-ray diffraction data.

| Compound | Wyckoff position | Atom  | x   | y   | z   | Uiso (Å)   | Occupies          |
|----------|------------------|-------|-----|-----|-----|------------|-------------------|
| BZT      | 1a               | Ba    | 0.5 | 0.5 | 0.5 | 0.0189(5)  | 0.962(19)         |
|          | 1b               | Ti/Zr | 0   | 0   | 0   | 0.0157(4)  | 0.17(3)/0.83(3)   |
|          | 3c               | O     | 0.5 | 0   | 0   | 0.0120(1)  | 1                 |
| BLaZT    | 1a               | Ba/La | 0.5 | 0.5 | 0.5 | 0.0125(9)  | 0.85(5)/ 0.12(5)  |
|          | 1b               | Ti/Zr | 0   | 0   | 0   | 0.0095(12) | 0.11(2)/ 0.89(2)  |
|          | 3c               | O     | 0.5 | 0   | 0   | 0.0091(15) | 1                 |
| BSmZT    | 1a               | Ba    | 0.5 | 0.5 | 0.5 | 0.0101(9)  | 0.919(5)/0.048(5) |
|          | 1b               | Ti/Zr | 0   | 0   | 0   | 0.0053(12) | 0.14 (1)/0.86 (1) |
|          | 3c               | O     | 0.5 | 0   | 0   | 0.0135(18) | 1                 |

Table S3. Selected bond distances (Å) and angles (°) for BZT, BLaZT and BSmZT powder from X-ray diffraction data.

| Bond distances (Å) and angles (°) | BZT         | BSmZT       | BLaZT       |
|-----------------------------------|-------------|-------------|-------------|
| Ti/Zr–O                           | 2.09015(12) | 2.08596(11) | 2.08904(13) |
| Ba/La–O                           | 2.95592(12) | 2.94999(11) | 2.95434(13) |
| 3×O1–Ti/Zr–O1                     | 180.0(5)    | 180.0(5)    | 180.0(5)    |
| 12×O1–Ti/Zr–O1                    | 90.000(2)   | 90.000(2)   | 90.0000(2)  |
| 6×O1–Ba/La–O1                     | 180.0(5)    | 180.0(5)    | 180.0(5)    |
| 12×O1–Ba/La–O1                    | 90.000(2)   | 90.000(2)   | 90.000(2)   |
| Ti/Zr–O–Ti/Zr                     | 180.0(5)    | 180.0(5)    | 180.0(5)    |
| 4xBa/La–O–Ba/La                   | 90.000(2)   | 90.000(2)   | 90.000(2)   |
| 2xBa/La–O–Ba/La                   | 180.0(5)    | 180.0(5)    | 180.0(5)    |
| 8xTi/Zr–O–Ba/La                   | 90.000(1)   | 90.000(1)   | 90.000(1)   |

Table S4. Equivalent circuit electrical parameters obtained from a complex impedance spectrum for BZT, BLaZT and BSmZT ceramics.

|       | T (°C) | R <sub>g</sub> (MΩ) | Q <sub>g</sub> (nF.s <sup>α-1</sup> ) | α <sub>g</sub> | R <sub>gb</sub> (MΩ) | Q <sub>gb</sub> (nF.s <sup>α-1</sup> ) | α <sub>gb</sub> |
|-------|--------|---------------------|---------------------------------------|----------------|----------------------|----------------------------------------|-----------------|
| BZT   | 320    | 86.96               | 0.191                                 | 0.987          | -----                | -----                                  | ----            |
|       | 330    | 37.88               | 0.192                                 | 0.987          | -----                | -----                                  | ----            |
|       | 340    | 18.72               | 0.197                                 | 0.985          | -----                | -----                                  | ----            |
|       | 350    | 12.09               | 0.202                                 | 0.984          | -----                | -----                                  | ----            |
|       | 360    | 8.60                | 0.207                                 | 0.982          | -----                | -----                                  | ----            |
|       | 370    | 6.24                | 0.214                                 | 0.980          | -----                | -----                                  | ----            |
|       | 380    | 4.45                | 0.221                                 | 0.978          | -----                | -----                                  | ----            |
| BSmZT | 320    | 5.50                | 1.08                                  | 0.926          | 0.455                | 0.263                                  | 0.957           |
|       | 330    | 4.73                | 1.17                                  | 0.922          | 0.374                | 0.269                                  | 0.955           |
|       | 340    | 3.41                | 1.34                                  | 0.912          | 0.278                | 0.264                                  | 0.952           |
|       | 350    | 2.57                | 1.49                                  | 0.906          | 0.216                | 0.263                                  | 0.949           |
|       | 360    | 1.88                | 1.66                                  | 0.899          | 0.165                | 0.262                                  | 0.946           |
|       | 370    | 1.53                | 1.76                                  | 0.896          | 0.137                | 0.261                                  | 0.945           |
|       | 380    | 1.12                | 1.91                                  | 0.890          | 0.105                | 0.262                                  | 0.942           |
| BLaZT | 320    | 3.08                | 0.832                                 | 0.949          | 0.221                | 0.312                                  | 0.977           |
|       | 330    | 1.91                | 0.920                                 | 0.945          | 0.162                | 0.311                                  | 0.977           |
|       | 340    | 1.31                | 0.951                                 | 0.940          | 0.139                | 0.306                                  | 0.976           |
|       | 350    | 0.875               | 1.069                                 | 0.937          | 0.129                | 0.297                                  | 0.976           |
|       | 360    | 0.717               | 1.102                                 | 0.932          | 0.083                | 0.290                                  | 0.975           |
|       | 370    | 0.551               | 1.152                                 | 0.930          | 0.069                | 0.304                                  | 0.974           |
|       | 380    | 0.475               | 0.832                                 | 0.928          | 0.059                | 0.303                                  | 0.974           |

Table S5. Parameters obtained from Joncher's plot for BZT, BLaZT and BSmZT ceramics.

| Compound | T (°C) | $\sigma_{DC}$ ( $\Omega.m$ ) <sup>-1</sup>    | $A_1$ ( $\Omega^{-1} m^{-1} rad^{-s}$ )        | $s_1$            | $A_2$ ( $\Omega^{-1} m^{-1} rad^{-s}$ )       | $s_2$            |
|----------|--------|-----------------------------------------------|------------------------------------------------|------------------|-----------------------------------------------|------------------|
| BZT      | 320    | $4.38 \times 10^{-6} \pm 1.34 \times 10^{-7}$ | $3.84 \times 10^{-9} \pm 5.86 \times 10^{-10}$ | $0.68 \pm 0.03$  | -----                                         | -----            |
|          | 330    | $8.35 \times 10^{-6} \pm 3.07 \times 10^{-7}$ | $4.53 \times 10^{-9} \pm 3.72 \times 10^{-10}$ | $0.67 \pm 0.04$  | -----                                         | -----            |
|          | 340    | $1.45 \times 10^{-5} \pm 2.84 \times 10^{-6}$ | $5.03 \times 10^{-9} \pm 4.58 \times 10^{-10}$ | $0.66 \pm 0.03$  | -----                                         | -----            |
|          | 350    | $2.15 \times 10^{-5} \pm 5.76 \times 10^{-6}$ | $5.28 \times 10^{-9} \pm 1.63 \times 10^{-10}$ | $0.65 \pm 0.01$  | -----                                         | -----            |
|          | 360    | $2.95 \times 10^{-5} \pm 3.51 \times 10^{-6}$ | $5.17 \times 10^{-9} \pm 7.14 \times 10^{-10}$ | $0.65 \pm 0.01$  | -----                                         | -----            |
|          | 370    | $3.95 \times 10^{-5} \pm 4.62 \times 10^{-6}$ | $5.73 \times 10^{-9} \pm 4.96 \times 10^{-10}$ | $0.64 \pm 0.03$  | -----                                         | -----            |
|          | 380    | $4.48 \times 10^{-5} \pm 2.04 \times 10^{-6}$ | $6.93 \times 10^{-9} \pm 6.35 \times 10^{-10}$ | $0.63 \pm 0.02$  | -----                                         | -----            |
| BSmZT    | 320    | $1.30 \times 10^{-5} \pm 7.34 \times 10^{-6}$ | $1.65 \times 10^{-8} \pm 2.86 \times 10^{-9}$  | $0.74 \pm 0.03$  | $1.35 \times 10^{-7} \pm 1.55 \times 10^{-8}$ | $0.54 \pm 0.01$  |
|          | 330    | $1.65 \times 10^{-5} \pm 1.25 \times 10^{-6}$ | $1.91 \times 10^{-8} \pm 1.33 \times 10^{-9}$  | $0.79 \pm 0.03$  | $1.42 \times 10^{-7} \pm 2.86 \times 10^{-8}$ | $0.53 \pm 0.01$  |
|          | 340    | $2.40 \times 10^{-5} \pm 2.56 \times 10^{-6}$ | $2.12 \times 10^{-8} \pm 2.76 \times 10^{-9}$  | $0.84 \pm 0.04$  | $1.56 \times 10^{-7} \pm 2.76 \times 10^{-8}$ | $0.52 \pm 0.01$  |
|          | 350    | $3.07 \times 10^{-5} \pm 4.09 \times 10^{-6}$ | $2.76 \times 10^{-8} \pm 3.56 \times 10^{-9}$  | $0.87 \pm 0.04$  | $1.88 \times 10^{-7} \pm 1.94 \times 10^{-8}$ | $0.51 \pm 0.02$  |
|          | 360    | $4.01 \times 10^{-5} \pm 3.55 \times 10^{-6}$ | $3.12 \times 10^{-8} \pm 1.71 \times 10^{-9}$  | $0.90 \pm 0.03$  | $2.68 \times 10^{-7} \pm 2.88 \times 10^{-8}$ | $0.50 \pm 0.01$  |
|          | 370    | $4.94 \times 10^{-5} \pm 7.42 \times 10^{-6}$ | $3.95 \times 10^{-8} \pm 2.82 \times 10^{-9}$  | $0.93 \pm 0.02$  | $3.10 \times 10^{-7} \pm 9.98 \times 10^{-8}$ | $0.43 \pm 0.02$  |
|          | 380    | $6.11 \times 10^{-5} \pm 3.83 \times 10^{-6}$ | $5.34 \times 10^{-8} \pm 1.25 \times 10^{-9}$  | $0.95 \pm 0.03$  | $4.77 \times 10^{-7} \pm 1.54 \times 10^{-8}$ | $0.42 \pm 0.02$  |
| BLaZT    | 320    | $2.03 \times 10^{-5} \pm 3.46 \times 10^{-6}$ | $2.76 \times 10^{-8} \pm 2.26 \times 10^{-9}$  | $0.64 \pm 0.04$  | $2.44 \times 10^{-7} \pm 2.36 \times 10^{-8}$ | $0.49 \pm 0.01$  |
|          | 330    | $2.91 \times 10^{-5} \pm 3.11 \times 10^{-6}$ | $4.65 \times 10^{-8} \pm 1.36 \times 10^{-9}$  | $0.66 \pm 0.03$  | $2.55 \times 10^{-7} \pm 2.75 \times 10^{-8}$ | $0.47 \pm 0.01$  |
|          | 340    | $4.08 \times 10^{-5} \pm 2.53 \times 10^{-6}$ | $4.95 \times 10^{-8} \pm 6.24 \times 10^{-9}$  | $0.687 \pm 0.03$ | $3.90 \times 10^{-7} \pm 2.03 \times 10^{-8}$ | $0.45 \pm 0.008$ |
|          | 350    | $5.32 \times 10^{-5} \pm 3.24 \times 10^{-6}$ | $6.75 \times 10^{-8} \pm 8.15 \times 10^{-9}$  | $0.73 \pm 0.03$  | $4.72 \times 10^{-7} \pm 2.79 \times 10^{-8}$ | $0.45 \pm 0.009$ |
|          | 360    | $6.51 \times 10^{-5} \pm 5.84 \times 10^{-6}$ | $9.41 \times 10^{-8} \pm 2.01 \times 10^{-9}$  | $0.75 \pm 0.03$  | $6.28 \times 10^{-7} \pm 3.97 \times 10^{-8}$ | $0.44 \pm 0.009$ |
|          | 370    | $7.41 \times 10^{-5} \pm 7.35 \times 10^{-6}$ | $2.73 \times 10^{-7} \pm 2.64 \times 10^{-8}$  | $0.81 \pm 0.03$  | $7.61 \times 10^{-7} \pm 4.73 \times 10^{-8}$ | $0.43 \pm 0.009$ |
|          | 380    | $8.54 \times 10^{-5} \pm 6.05 \times 10^{-6}$ | $3.69 \times 10^{-7} \pm 1.25 \times 10^{-8}$  | $0.83 \pm 0.03$  | $9.03 \times 10^{-7} \pm 1.01 \times 10^{-8}$ | $0.40 \pm 0.01$  |
